# Supplementary material for: High-resolution analysis of multi-copy variant surface glycoprotein gene expression sites in African trypanosomes
Source: PubMed Central journal article supplement (PMC5070307; doi:10.1186/s12864-016-3154-8), 2016-10-18
Supplement: 12864_2016_3154_MOESM2_ESM.pdf [file 12864_2016_3154_MOESM2_ESM.pdf]

## Data Replicates

Bloodstream replicate Pearson = 0.999

Insect replicate Pearson = 0.998

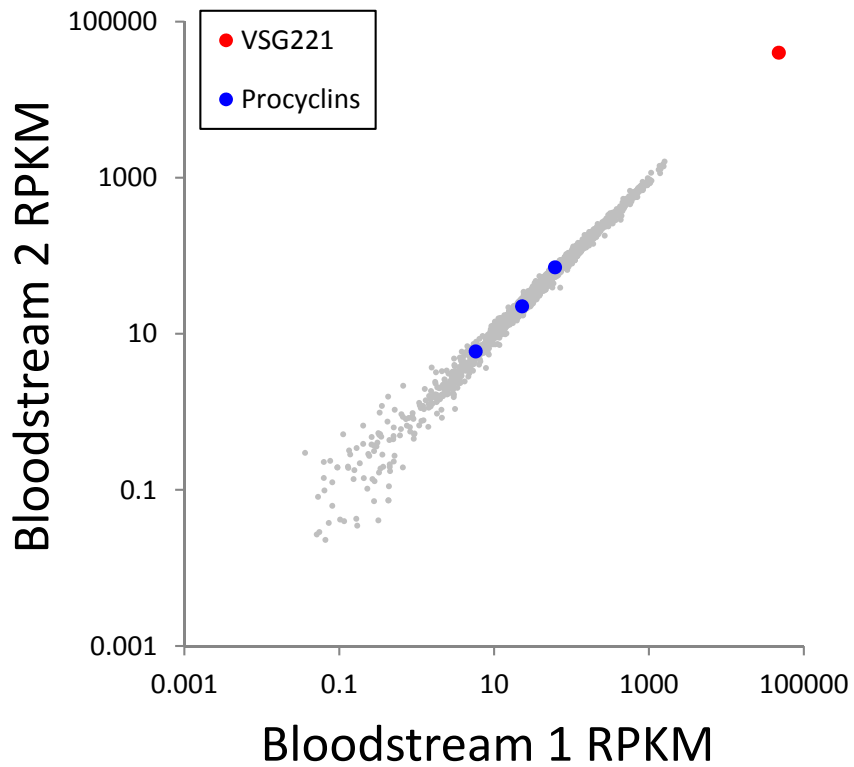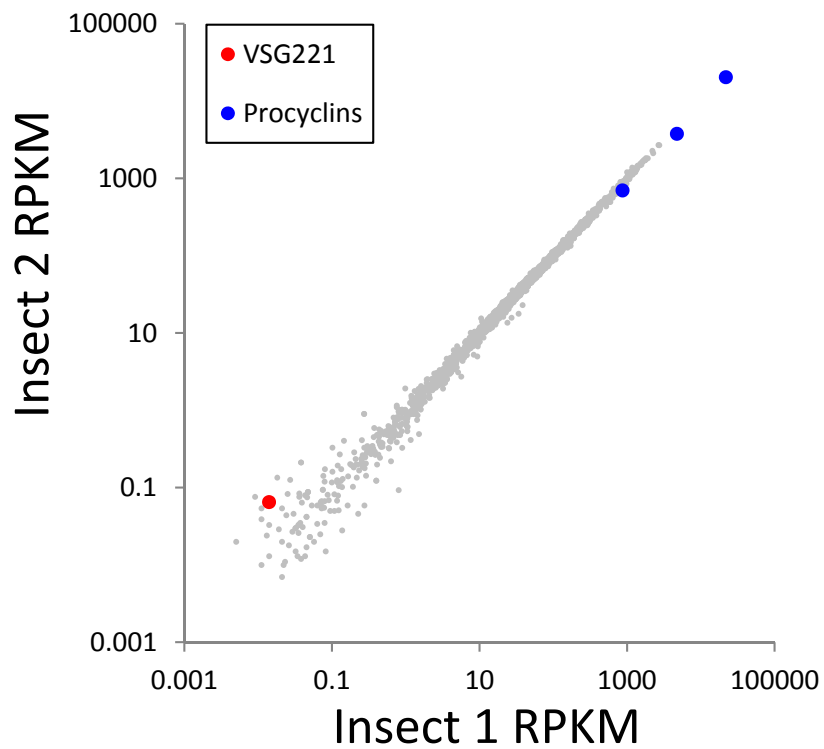

**Additional file 2:** Comparison of RNA-seq replicates. Scatter plots of bloodstream-form and insect-stage RPKM values for each condition. Data used to derive plots in Fig. 1 (MapQ >=0).
