# Supplementary material for: High-resolution analysis of multi-copy variant surface glycoprotein gene expression sites in African trypanosomes
Source: PubMed Central journal article supplement (PMC5070307; doi:10.1186/s12864-016-3154-8), 2016-10-18
Supplement: 12864_2016_3154_MOESM3_ESM.pdf [file 12864_2016_3154_MOESM3_ESM.pdf]

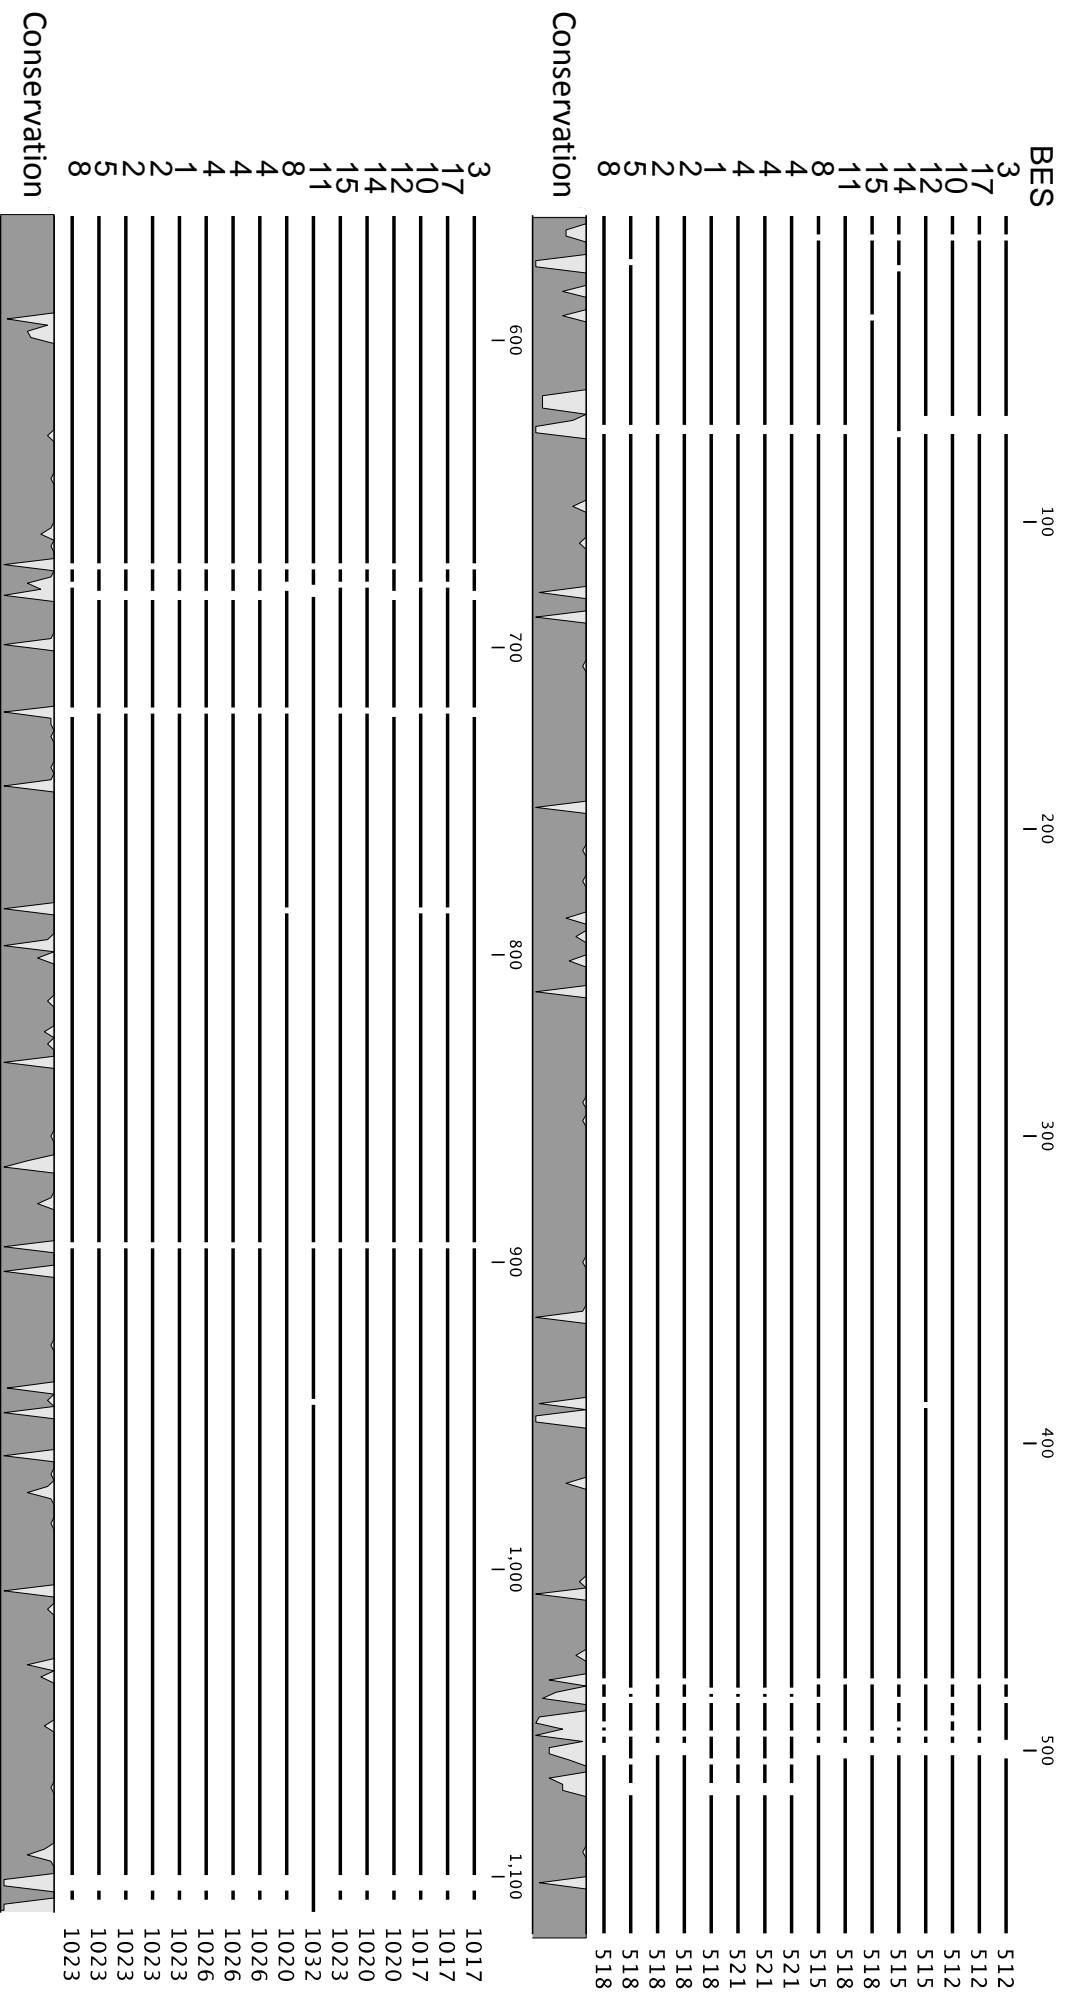

**Additional file 3: ESAG7 sequences are highly similar between VSG-ESs. Clustal alignment between ESAG7 nucleotide sequence in BES1 (Tb429.BES40.2) and other ESAG7 sequences. BES2, 4 and 8 have multiple ESAG7 genes.**
