# Supplementary material for: High-resolution analysis of multi-copy variant surface glycoprotein gene expression sites in African trypanosomes
Source: PubMed Central journal article supplement (PMC5070307; doi:10.1186/s12864-016-3154-8), 2016-10-18
Supplement: 12864_2016_3154_MOESM7_ESM.pdf [file 12864_2016_3154_MOESM7_ESM.pdf]

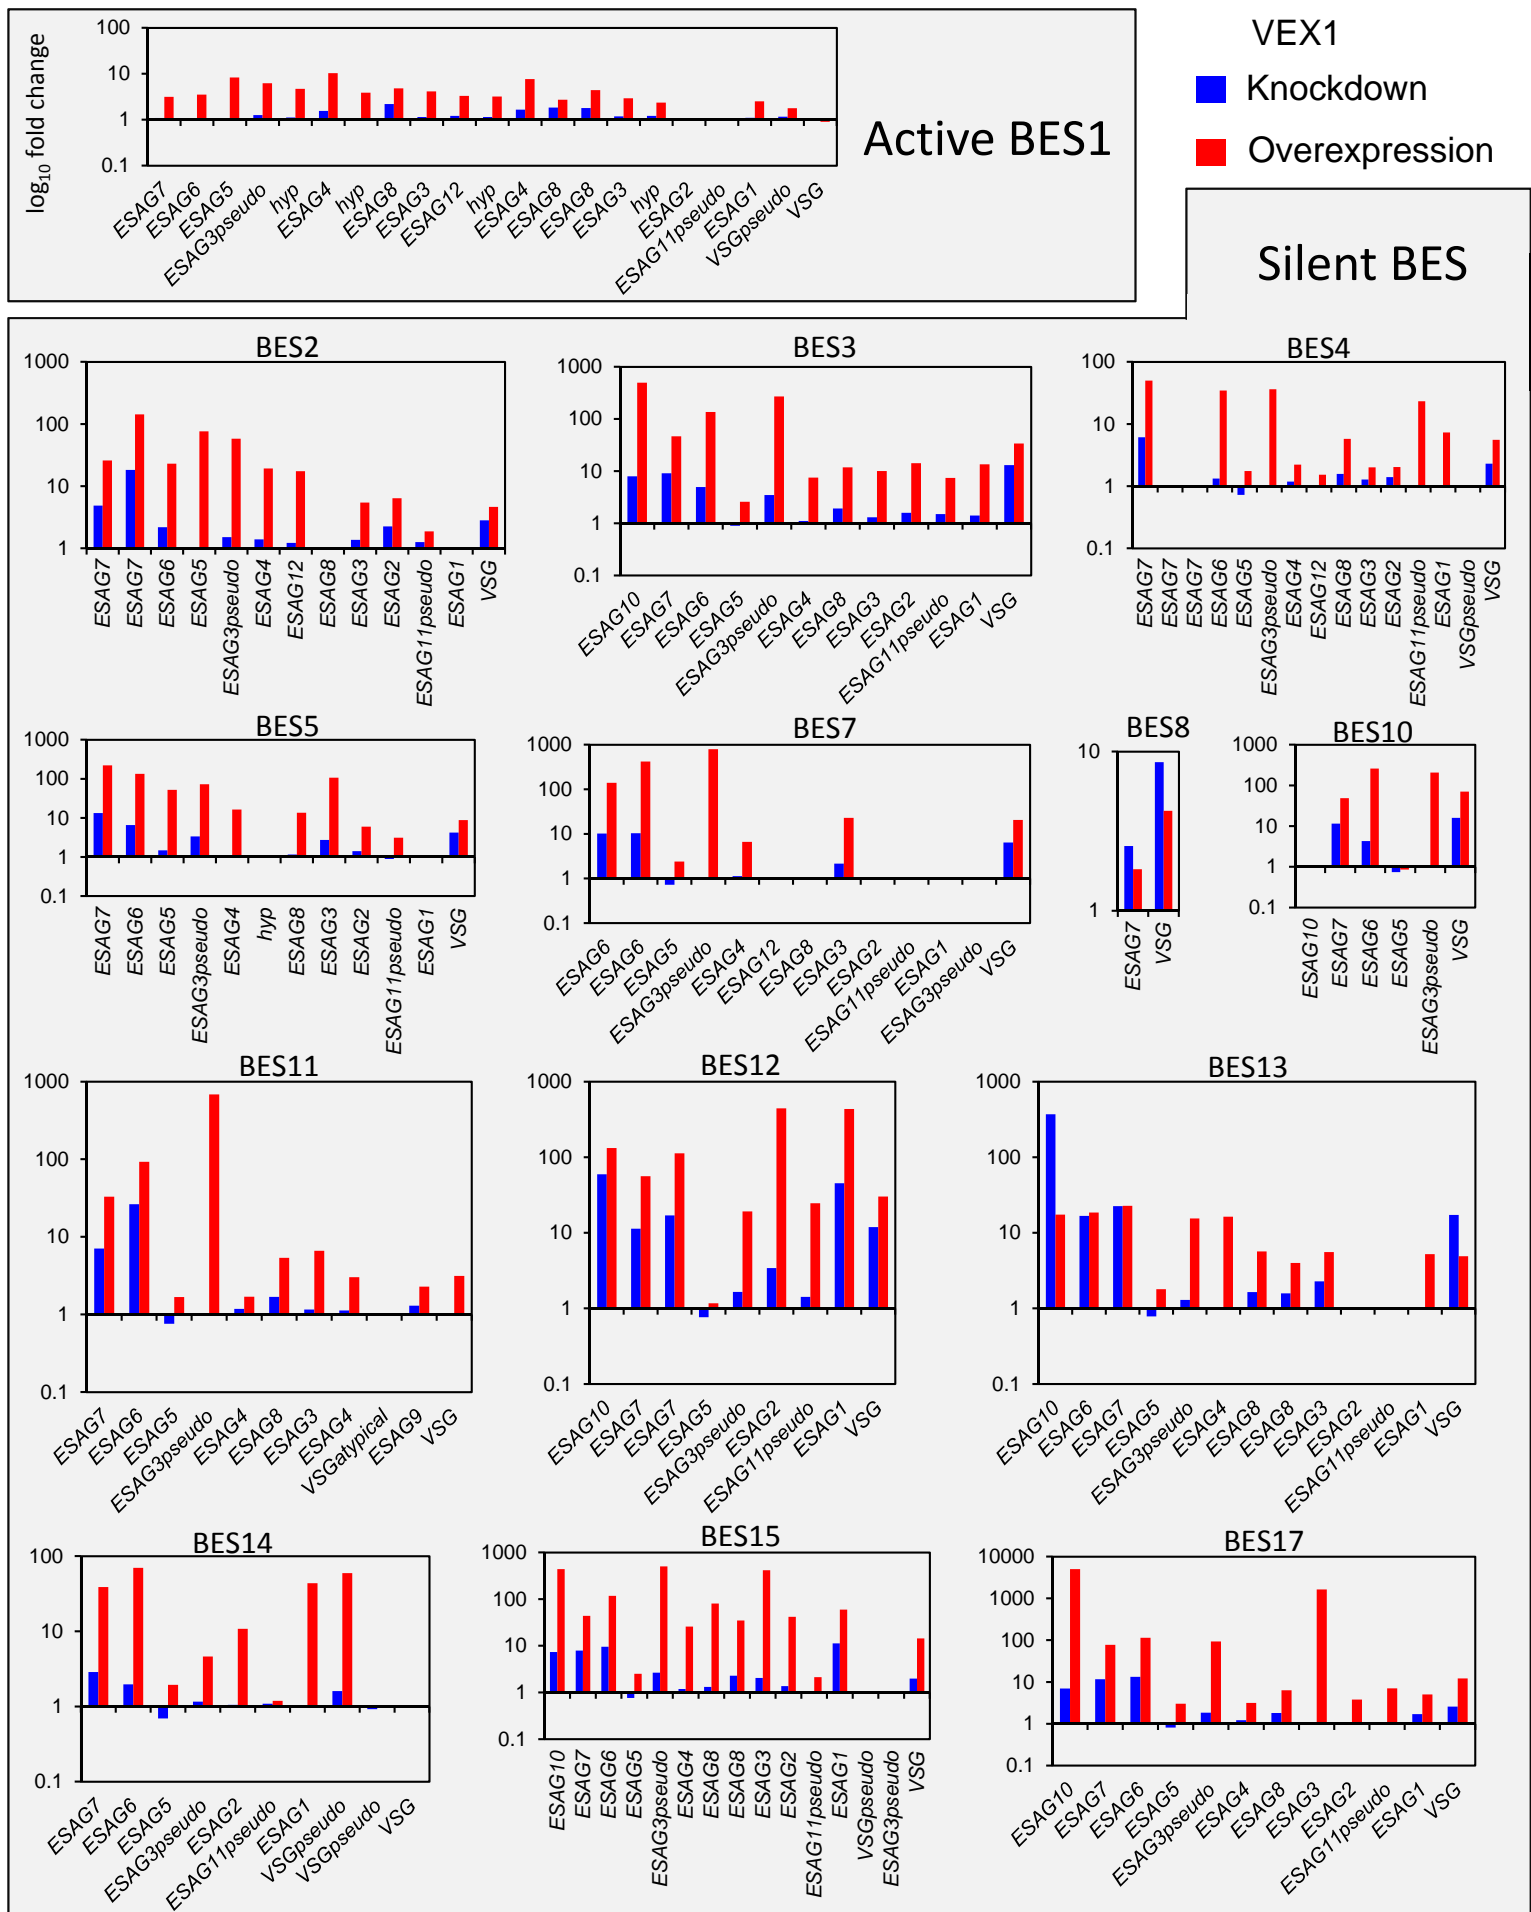

**Additional file 7:** Individual VSG-ES transcriptome analysis following VEX1 perturbation. Bar-charts show fold-changes for *ESAG* expression in each VSG-ES following either VEX1 knockdown (blue bars) or overexpression (red bars).
